# Supplementary material
Source: Springer Nature journal article supplement (https://www.springermedizin.de/resource/supplementary/12875_2013_1081_MOESM1_ESM.pdf/9435768)
Supplement: MOESM1 [file 9435768]

**Table S1: Summary of agreement between raters on presence (positive agreement) and absence (negative agreement) of discussion of disease areas in consultations**

| Disease area                      | ICPC heading | Positive agreement             |             | Negative agreement             |             |
|-----------------------------------|--------------|--------------------------------|-------------|--------------------------------|-------------|
|                                   |              | N of observations <sup>1</sup> | % Agreement | N of observations <sup>2</sup> | % Agreement |
| General & unspecified             | A            | 38                             | 84%         | 82                             | 93%         |
| Blood & immune mechanism          | B            | 10                             | 60%         | 110                            | 96%         |
| Digestive                         | D            | 19                             | 95%         | 101                            | 99%         |
| Eye                               | F            | 5                              | 80%         | 115                            | 99%         |
| Ear                               | H            | 4                              | 100%        | 116                            | 100%        |
| Cardiovascular                    | K            | 10                             | 80%         | 110                            | 98%         |
| Musculoskeletal                   | L            | 51                             | 94%         | 69                             | 96%         |
| Neurological                      | N            | 13                             | 77%         | 107                            | 97%         |
| Psychological                     | P            | 12                             | 83%         | 108                            | 98%         |
| Respiratory                       | R            | 20                             | 100%        | 100                            | 100%        |
| Skin                              | S            | 15                             | 67%         | 105                            | 95%         |
| Endocrine/metabolic & nutritional | T            | 16                             | 88%         | 104                            | 98%         |
| Urological                        | U            | 5                              | 80%         | 115                            | 99%         |
| Pregnancy, childbearing           | W            | 9                              | 67%         | 111                            | 97%         |
| Female genital                    | X            | 9                              | 89%         | 111                            | 99%         |
| Male genital                      | Y            | 8                              | 100%        | 112                            | 100%        |
| Social problems                   | Z            | 8                              | 100%        | 112                            | 100%        |
| All areas                         |              | 252                            | 87%         | 1788                           | 98%         |

<sup>1</sup>Total number of times area coded as present by one rater or the other

<sup>2</sup>Total number of times area coded as *not present* by one rater or the other
